# Supplementary material
Source: Springer Nature journal article supplement (https://www.springermedizin.de/resource/supplementary/13063_2011_729_MOESM3_ESM.pdf/9618586)
Supplement: MOESM3 [file 9618586]

**Table 1: Search terms used**

| <b>Key terms and Medical Subject Headings</b>                                                                                                                                                                                                                                                                                                                                            |
|------------------------------------------------------------------------------------------------------------------------------------------------------------------------------------------------------------------------------------------------------------------------------------------------------------------------------------------------------------------------------------------|
| Heart failure(exp), disease management program (exp), chf, manag(exp),<br>educat(exp), chronic disease (exp), program(exp), coach, usual care,<br>counsel(exp), directive, organization, managed care programs, patient education,<br>disease management (exp), care management (exp), randomized trial, program<br>evaluation, evaluat(exp), meta-anal(exp), metaanal(exp), review(exp) |

**Table 2: Meta-analyses included in review**

| Review (Reference number)  | Number of trials                        | N of total sample | Sex (% males) | Mean Age               | SD Age | Age Range (Years)  | AMSTAR Score |
|----------------------------|-----------------------------------------|-------------------|---------------|------------------------|--------|--------------------|--------------|
| Koshman et al. [35]        | 12                                      | 2060              | NR            | NR                     | NR     | 58-80              | 7            |
| Clark et al. [25]          | 14                                      | 4264              | NR            | NR                     | NR     | 57-75              | 8            |
| Gohler et al. [32]         | 36                                      | 8341              | 37-99%        | NR                     | NR     | 56-79              | 5            |
| Jovicic et al. [24]        | 6                                       | 857               | 53-76 %       | NR                     | NR     | 56-76              | 7            |
| Holland et al. [34]        | 30                                      | NR                | 27-99%        | NR                     | NR     | 56-80              | 4            |
| Kim & Soeken [23]          | 4                                       | NR                | NR            | NR                     | NR     | NR to 64.0 to 81.6 | 6            |
| Phillips et al. [31]       | 6                                       | 949               | 58%           | 73                     | NR     | 62-79              | 8            |
| Roccaforte et al. [28]     | 33                                      | 3817              | 42%           | 73                     | NR     | NR                 | 8            |
| Taylor et al. [27]         | 16                                      | 1627              | 23-86%        | NR                     | NR     | 70-80              | 9            |
| Whellan et al. [36]        | 19                                      | 5752              | NR            | NR                     | NR     | 56-80              | 2            |
| Gonseth et al.[37]         | 54: 27 randomized and 27 non-randomized | 3160              | NR            | Over 70 in most trials | NR     | Not summarized     | 9            |
| Gwadry-Sridhar et al. [33] | 8                                       | 1239              | 37-58%        | NR                     | NR     | 71 -80.3           | 6            |
| McAlister et al. [30]      | 29                                      | 5039              | NR            | NR                     | NR     | 56-80              | 5            |
| Phillips et al. [29]       | 18                                      | 3304              | 62%           | NR                     | NR     | NR                 | 7            |
| McAlister et al. [26]      | 11                                      | 2067              | NR            | NR                     | NR     | 63-80              | 5            |

**Table 3: Select population characteristics**

| Reporting of population characteristics         |       |                                        |
|-------------------------------------------------|-------|----------------------------------------|
| No information on co-morbidities                | 7/15  | [24, 25, 29, 30, 32, 33, 35]           |
| Incomplete or no data on NYHA Classification    | 10/15 | [9, 23, 24, 26, 27, 29, 30, 33, 35-37] |
| No data on NYHA Classification                  | 4/15  | [23, 26, 27, 30]                       |
| Range of NYHA Classification only               | 6/15  | [24, 25, 28, 31, 32, 37 ]              |
| Information on LVEF                             | 6/15  | [25, 29, 31, 34, 36, 37]               |
| Summaries of ACE-I and BB medication treatments | 3/15  | [32, 36, 37]                           |

<sup>a</sup>NYHA, New York Heart Association

<sup>b</sup>LVEF, Left Ventricular Ejection Fraction

<sup>c</sup>ACE-I, Ace-Inhibitor

<sup>d</sup>BB, Beta Blocker

**Table 4: Definitions of trials and characteristics of interventions actually included**

| <b>Definitions of interventions included in reviews</b>          |       |                                 |
|------------------------------------------------------------------|-------|---------------------------------|
| No definition                                                    | 1/15  | [33]                            |
| Operationalized definition                                       | 11/15 | [23-27, 30-32, 34, 36, 37]      |
| Definitions incorporate approach, personnel, setting and content | 3/15  | [23, 26, 27]                    |
| Concept of a disease management program                          | 5/15  | [26, 28, 30, 31, 36]            |
| Concept of comprehensive treatment approach                      | 6/15  | [23, 24, 27, 29, 34, 37]        |
| Interventions provided in particular settings                    | 4/15  | [23, 25-27]                     |
| <b>Intervention Settings</b>                                     |       |                                 |
| Five settings/modes of provision                                 | 2/15  | [29, 34]                        |
| Four settings                                                    | 7/15  | [27, 30, 31, 33, 35-37]         |
| Three settings                                                   | 4/15  | [24, 26, 28, 32]                |
| Single or comparable setting                                     | 2/15  | [23, 25]                        |
| <b>Type of setting</b>                                           |       |                                 |
| All settings                                                     | 2/15  | [29, 34]                        |
| Hospital (Pre-discharge)                                         | 10/15 | [23, 27-29, 31, 33-37]          |
| Hospital and home-based components                               | 9/15  | [27-29, 31, 33-37]              |
| Home and community                                               | 9/15  | [27-29, 31, 33-37]              |
| At home                                                          | 13/15 | [24, 26-37]                     |
| Out-patient                                                      | 13/15 | [24, 26-37]                     |
| Telephone                                                        | 11/15 | [24, 25, 27, 29-35, 37]         |
| Remote provision                                                 | 5/15  | [25, 29, 30, 34, 36]            |
| <b>Professionals</b>                                             |       |                                 |
| Nurse-led                                                        | 11/15 | [23, 24, 26, 28-32, 34, 36, 37] |
| 'Multi-disciplinary teams'                                       | 10/15 | [23, 25, 26, 28, 30, 32-35, 37] |
| Physician involvement via cardiologist or GP                     | 9/15  | [26, 28-32, 35-37]              |
| Both cardiologist and GP                                         | 3/15  | [26, 30, 36]                    |
| Pharmacist                                                       | 6/15  | [28-30, 32, 35, 37]             |

**Table 5: Components of interventions included and trial quality**

| <b>Number of components</b>         |         |                                |
|-------------------------------------|---------|--------------------------------|
| 3-4                                 | 8/15    | [23, 24, 27-29, 31, 32, 35]    |
| >4                                  | 3/15    | [26, 30, 37]                   |
| Educational components              | 13/15   | [23, 24, 26-35, 37]            |
| Monitoring via home visits or phone | 13 / 15 | [23, 24, 26-32, 34-37]         |
| Support at hospital discharge       | 10/15   | [23, 24, 26, 28-32, 36, 37]    |
| Medication review                   | 9/15    | [24, 26-28, 30-32, 35, 37]     |
| Social support                      | 5/15    | [26, 27, 29, 30, 37]           |
| <b>Comparison Groups</b>            |         |                                |
| No information                      | 11/15   | [23-26, 29-31, 33, 34, 36, 37] |

**Table 6: Effect sizes of primary outcomes of reviews (95% Confidence Intervals)**

| <b>Review (reference number)</b> | <b>All cause mortality</b> | <b>All cause re-hospitalization</b> | <b>HF-related hospitalization</b> |
|----------------------------------|----------------------------|-------------------------------------|-----------------------------------|
| Koshman et al. [35]              | OR 0.84 (0.61-1.15)        | OR 0.71 (0.54-0.94)                 | OR 0.69 (0.51-0.94)               |
| Clark et al. [25]                | RR 0.80 (0.69-0.92)        | RR 0.95 (0.89-1.02)                 | RR 0.79 (0.69-0.89)               |
| Gohler et al. [32]               | RD 0.03 (0.01-0.05)        | RD 0.08 (0.05-0.11)                 | NA                                |
| Jovicic et al. [24]              | OR 0.93 (0.57-1.51)        | OR 0.59 (0.44-0.80)                 | OR 0.44 (0.27-0.71)               |
| Holland et al. [34]              | RR 0.79 (0.69-0.92)        | RR 0.84 (0.79-0.95)                 | RR 0.70 (0.61-0.81)               |
| Kim & Soeken [23]                | NA                         | OR 0.87 (0.69-1.04)                 | NA                                |
| Phillips et al. [31]             | RR 0.80 (0.57-1.13)        | RR 0.91 (0.72-1.16)                 | NA                                |
| Roccaforte et al. [28]           | OR 0.80 (0.69-0.93)        | OR 0.76 (0.69-0.94)                 | OR 0.58 (0.50-0.67)               |
| Taylor et al. [27]               | OR 0.86 (0.67-1.10)        | NA                                  | OR 0.52 (0.39-0.70)               |
| Whellan et al. [36]              | NA                         | NA                                  | NA                                |
| Gonseth et al. [37]              | RR 0.75 (0.59-0.96)        | RR 0.88 (0.79-0.97)                 | RR 0.70 (0.62-0.79)               |
| Gwadry-Sridhar et al. [33]       | RR 0.98 (0.72-1.34)        | RR 0.79 (0.68-0.91)                 | NA                                |
| McAlister et al. [30]            | RR 0.83 (0.70-0.99)        | RR 0.84 (0.75-0.93)                 | RR 0.73 (0.66-0.82)               |
| Phillips et al. [29]             | RR 0.87(0.73-1.03)         | RR 0.75 (0.64-0.88)                 | RR 0.65 (0.54-0.79)               |
| McAlister et al. [26]            | RR 0.94 (0.75-1.19)        | RR 0.87 (0.79-0.96)                 | NA                                |

RR: Risk Ratio; RD: Risk Difference; OR: Odds Ratio

**Table 7 – Direction of effects Quality of Life**

|                                   | <b>Measures</b>                                    | <b>Pooling (Y/N)</b>                                                                 | <b>Result of pooling</b>                                                               |
|-----------------------------------|----------------------------------------------------|--------------------------------------------------------------------------------------|----------------------------------------------------------------------------------------|
| Phillips et al. (2005) [31]       | NHP<br>MLHF<br>HFSBS                               | Y<br>(5/6 studies reported QOL)                                                      | +<br>Intervention:<br>30.6±20.7% VS. control:<br>19.3±12.6%, p=0.13                    |
| Gwadry-Sridhar et al. (2004) [33] | SF-36                                              | N<br>(4/8 studies reported HRQOL; precluded pooling)                                 | RNPH                                                                                   |
| Koshman et al. (2008) [35]        | MLHF<br>COOP/WONCA<br>SF-36<br>EQ-5D<br>CHFQ       | N<br>(7/12 studies reported HRQOL; precluded pooling)                                | RNPH                                                                                   |
| Roccaforte et al. (2005) [28]     | MLHF<br>SF-36                                      | N<br>(16/33 studies reported QOL; varying presentation of results precluded pooling) | RNPH                                                                                   |
| Taylor et al. (2005) [27]         | MLHF<br>QLHFQ<br>CHFQ<br>Time trade off method (?) | N<br>(8/16 studies reported HRQOL; varying results)                                  | RNPH                                                                                   |
| Phillips et al. (2004) [29]       | MLHF<br>NHP<br>HFSBS<br>SF-36                      | Y<br>(5/18 studies reported HRQOL)                                                   | +<br>Intervention: 25.7% [95% CI, 11.0%-40.4%] VS. control: 13.5% [95% CI, 5.1%-22.0%] |
| McAlister et al. (2001) [26]      | NR                                                 | N (5/11 studies reported HRQOL)                                                      | Insufficient data                                                                      |

HRQOL = Health-related quality of life; QOL= Quality of life

MLHF = Minnesota Living with Heart Failure Questionnaire ; COOP/WONCA = Dartmouth Primary Care Cooperative Research Network/World Organization of National Colleges, Academics and Academic Associations of General Practitioners/Family Physicians ; SF-36 = 36-Item Short-Form Health Survey; EQ-5D = EuroQol-5 Dimensions form

NHP = Nottingham Health Profile; HFSBS = Heart Failure Self Care Behaviour Scale ; QLHFQ = Quality of Life in Heart Failure Questionnaire; CHFQ = Chronic Heart Failure Questionnaire

RNPH: Results not pooled due to heterogeneity

+= Non-significant trend favoring intervention

++= Significant trend favoring intervention

**Table 8: Trial quality and heterogeneity**

|                                               |                              |
|-----------------------------------------------|------------------------------|
| <b>Conclusions</b>                            |                              |
| <b>Quality</b>                                |                              |
| Trial quality taken into account              | [35, 37]                     |
| Trial quality mentioned                       | [23, 24, 27, 33]             |
| <b>Heterogeneity</b>                          |                              |
| Discussed                                     | [27, 28, 30, 32, 34, 35, 37] |
| Statistical Assessment                        | [23-35, 37]                  |
| Cochran's Q test and I <sup>2</sup> statistic | [23-35, 37]                  |
| Clinical acknowledged                         | [24, 25, 32]                 |
| Methodological acknowledged                   | [26, 33, 35]                 |
